# Supplementary material for: Secreted breast tumor interstitial fluid microRNAs and their target genes are associated with triple-negative breast cancer, tumor grade, and immune infiltration
Source: Springer Nature journal article supplement (doi:10.1186/s13058-020-01295-6), 2020-06-30

Fig. S1 A

● normal ● tumor

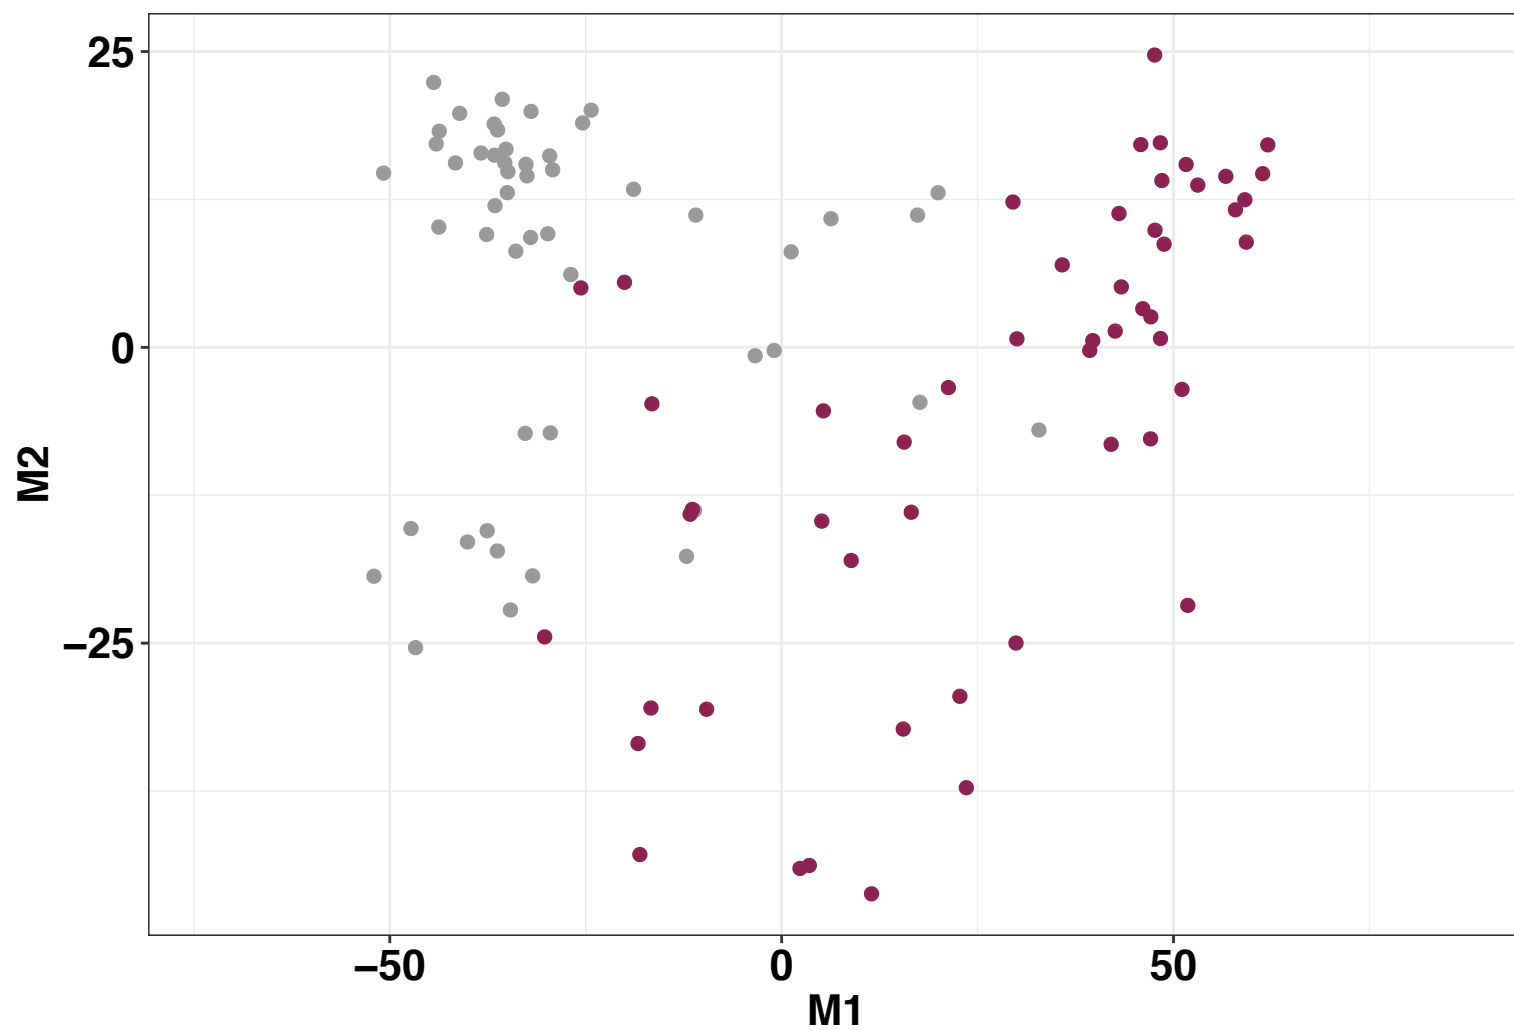

Fig. S1 B

● normal ● tumor

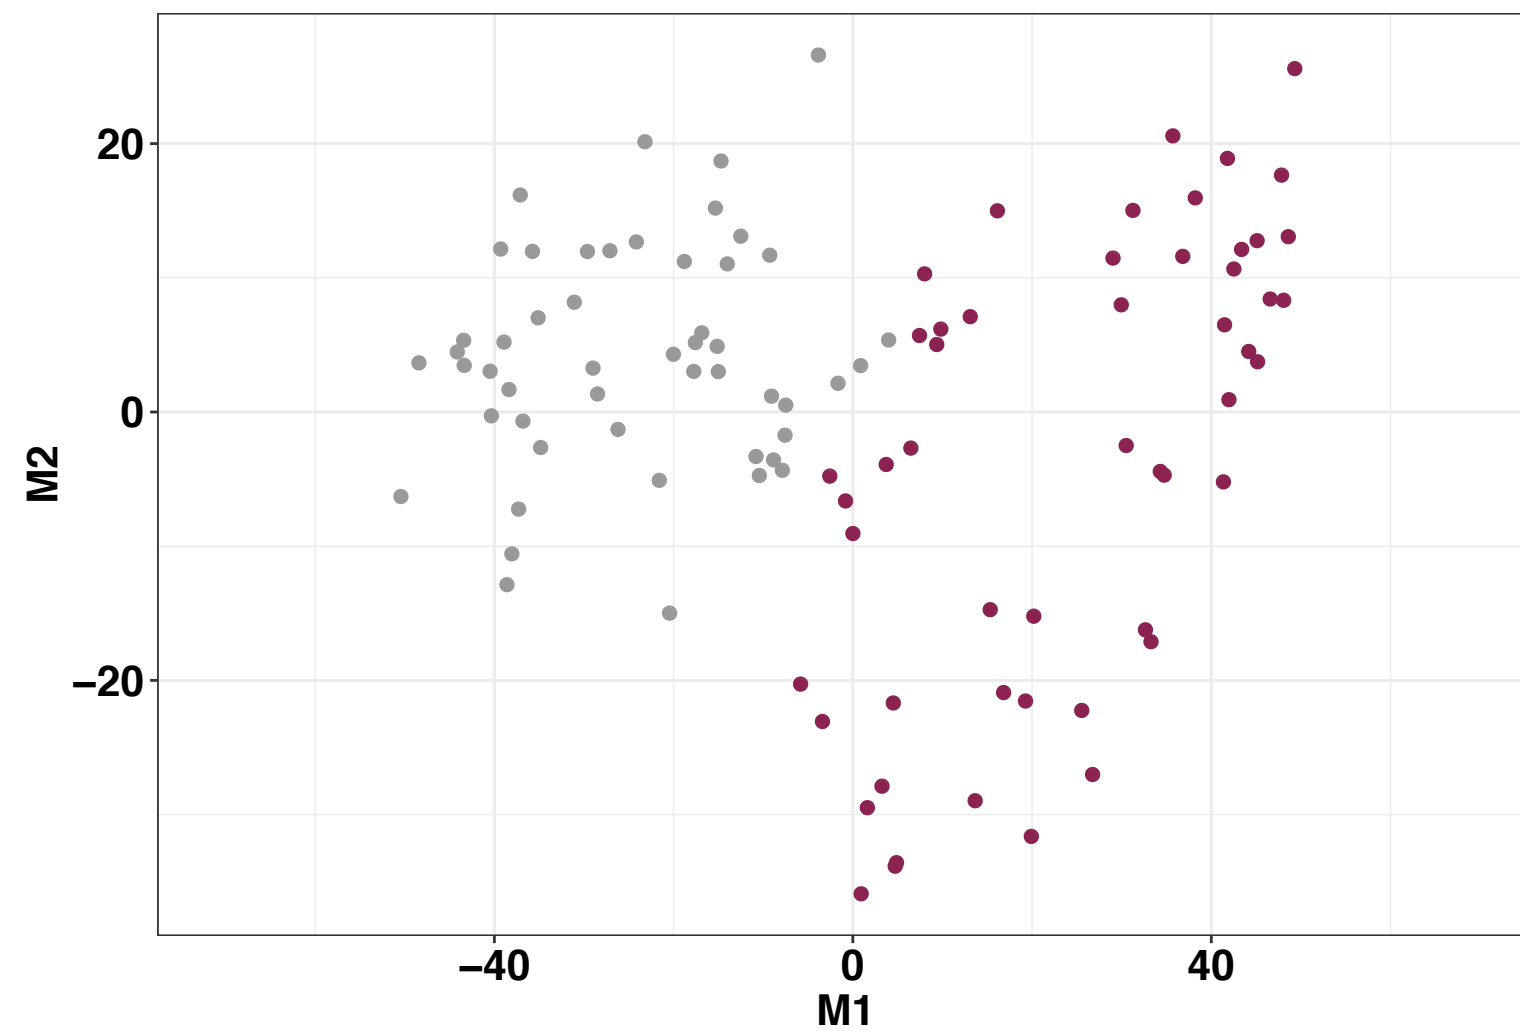

Fig. S1 C

● LumA ● LumB ● LumB\_HER2\_enriched ● HER2 ● TNBC

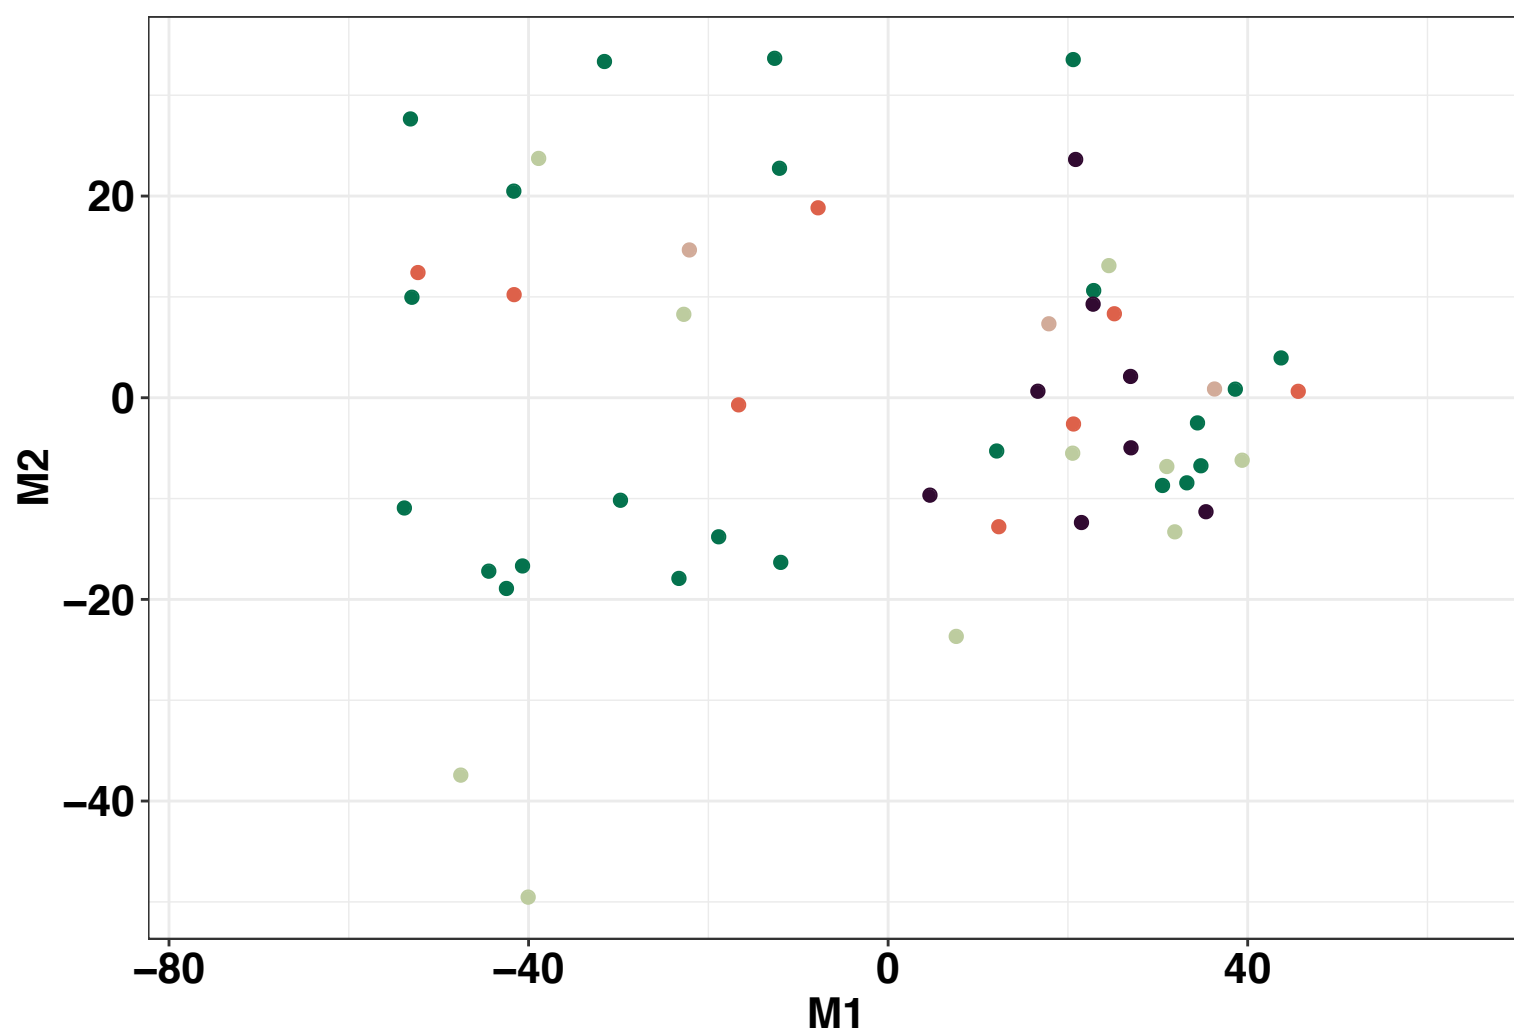

Fig. S1 D

● LumA ● LumB ● LumB\_HER2\_enriched ● HER2 ● TNBC

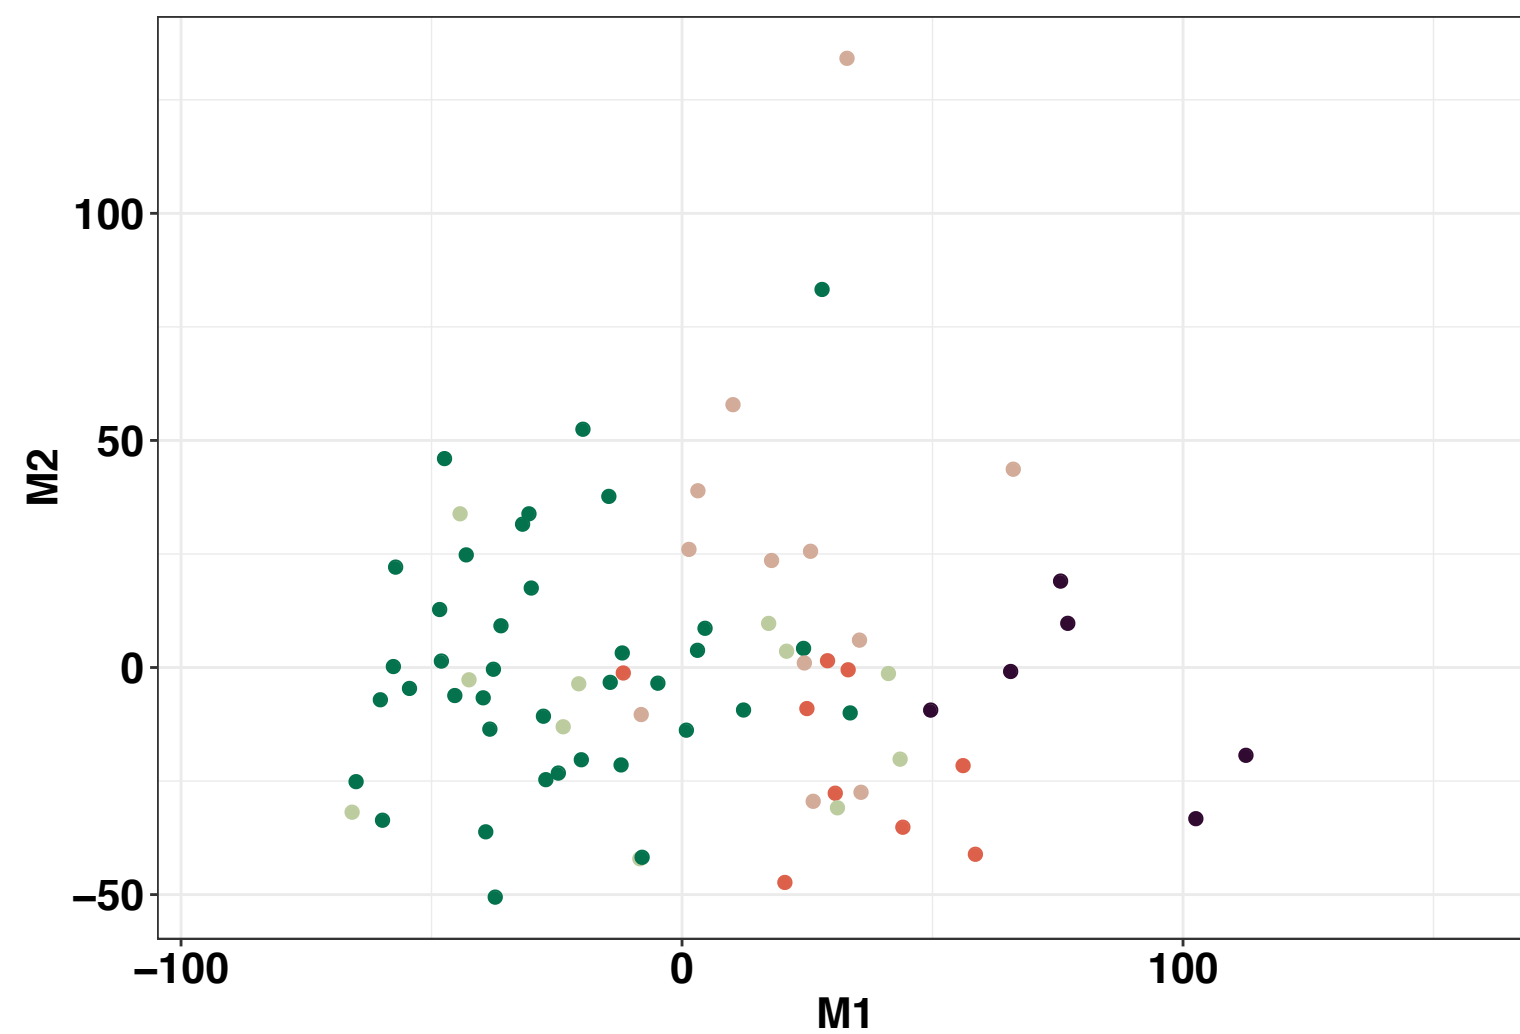

Supplement: MOESM1 [file 18133352]
