# Supplementary material for: Secreted breast tumor interstitial fluid microRNAs and their target genes are associated with triple-negative breast cancer, tumor grade, and immune infiltration
Source: Springer Nature journal article supplement (doi:10.1186/s13058-020-01295-6), 2020-06-30

Fig. S2 A

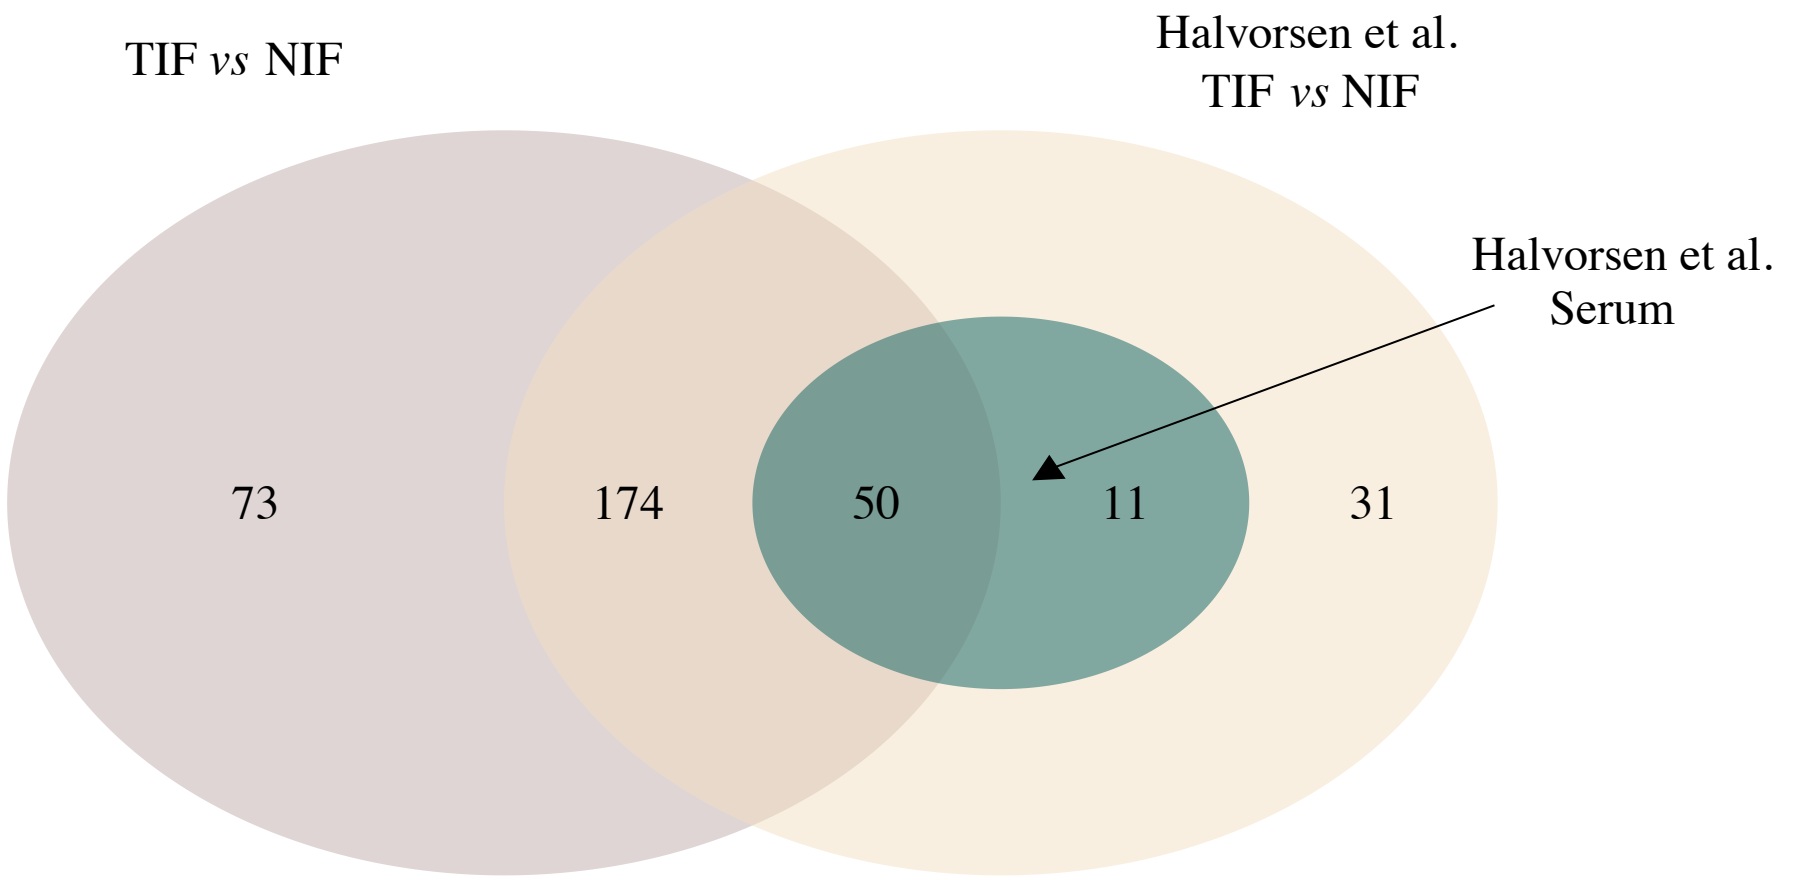

Fig. S2 B

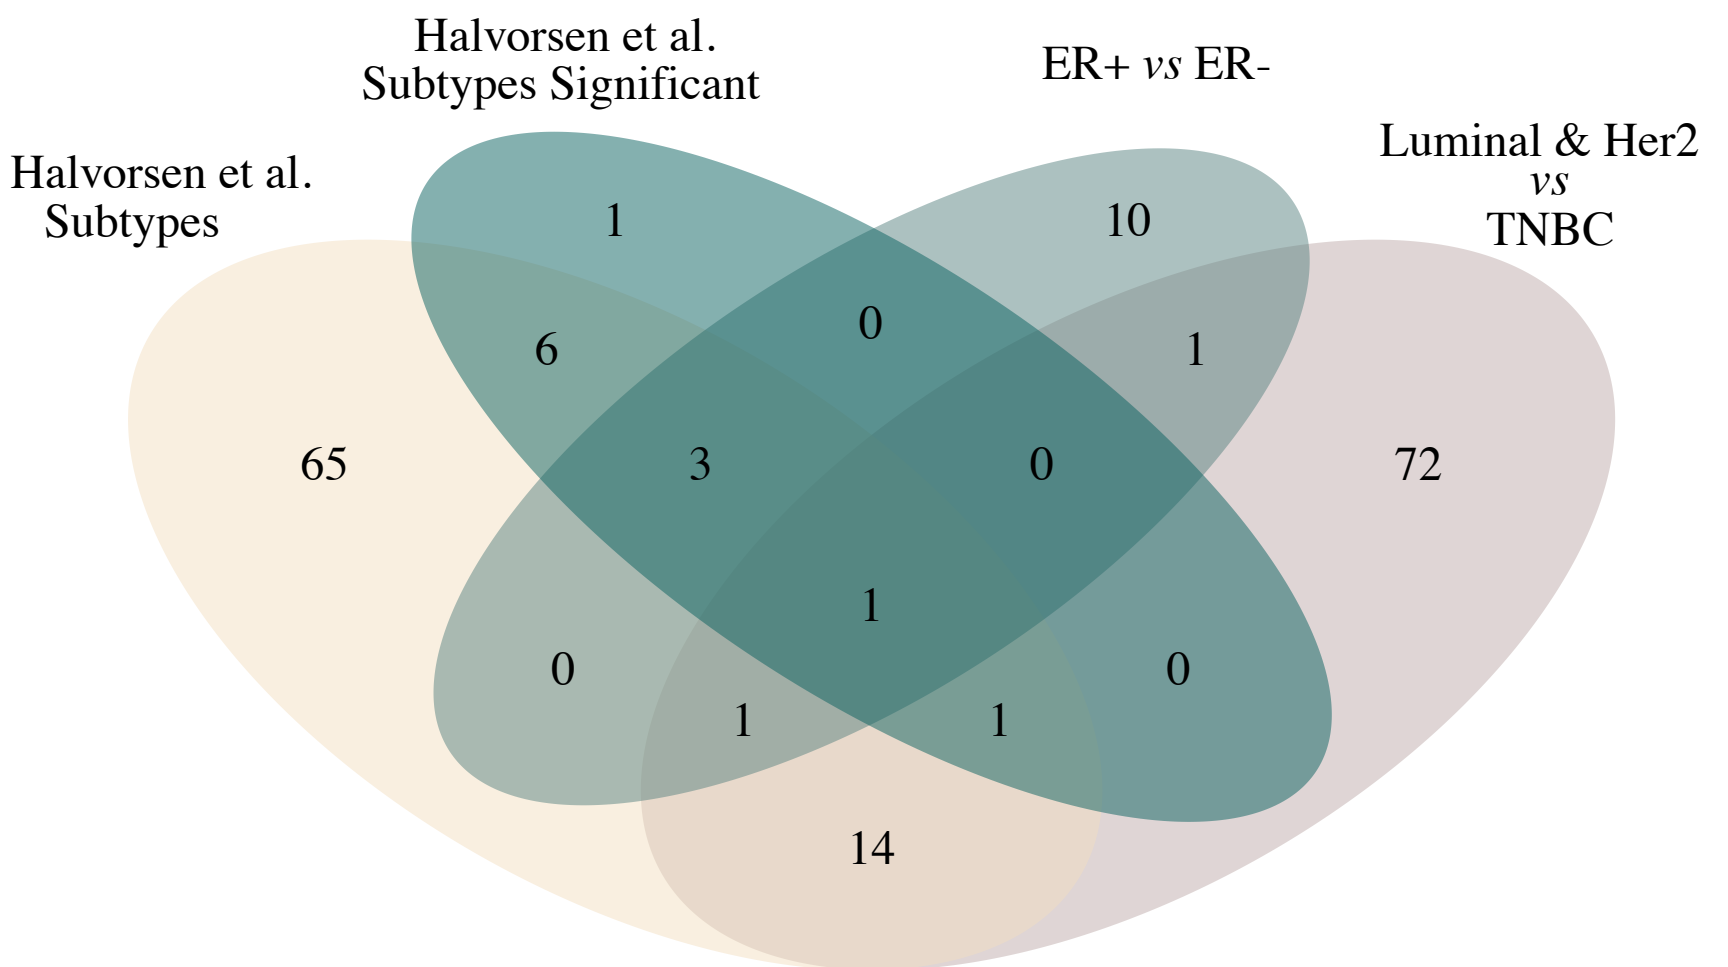

Fig. S2 C

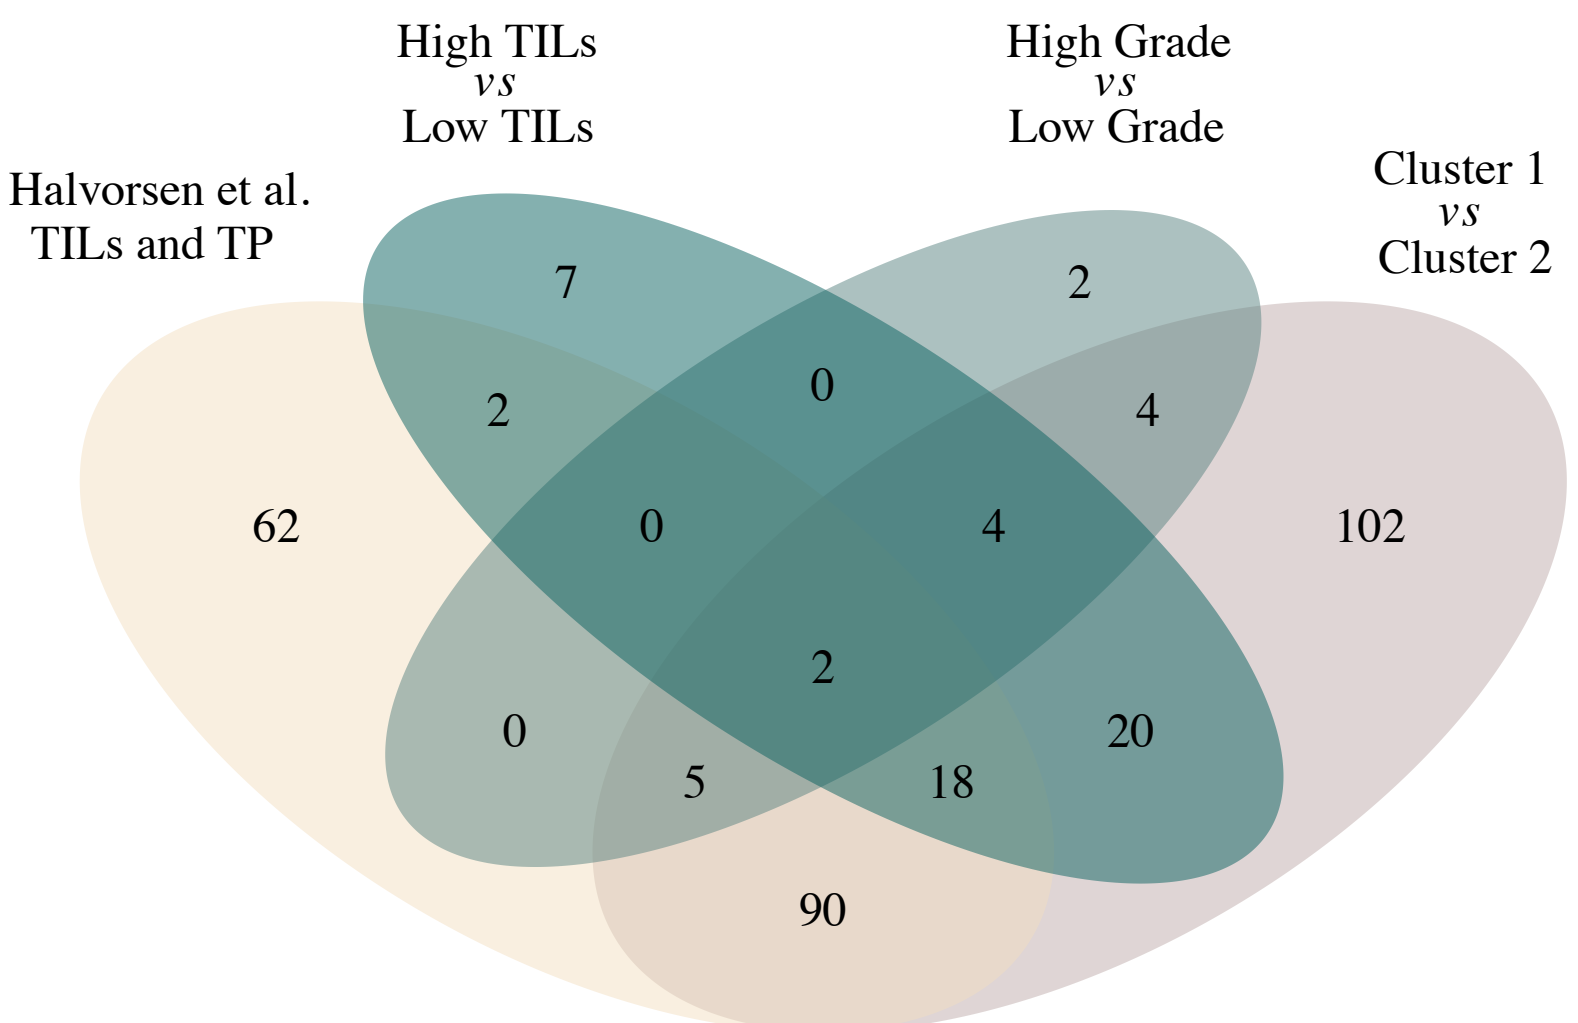

Supplement: MOESM3 [file 18133352]
