# Supplementary material for: Secreted breast tumor interstitial fluid microRNAs and their target genes are associated with triple-negative breast cancer, tumor grade, and immune infiltration
Source: Springer Nature journal article supplement (doi:10.1186/s13058-020-01295-6), 2020-06-30

**Fig. S6**

Fig. S6 A

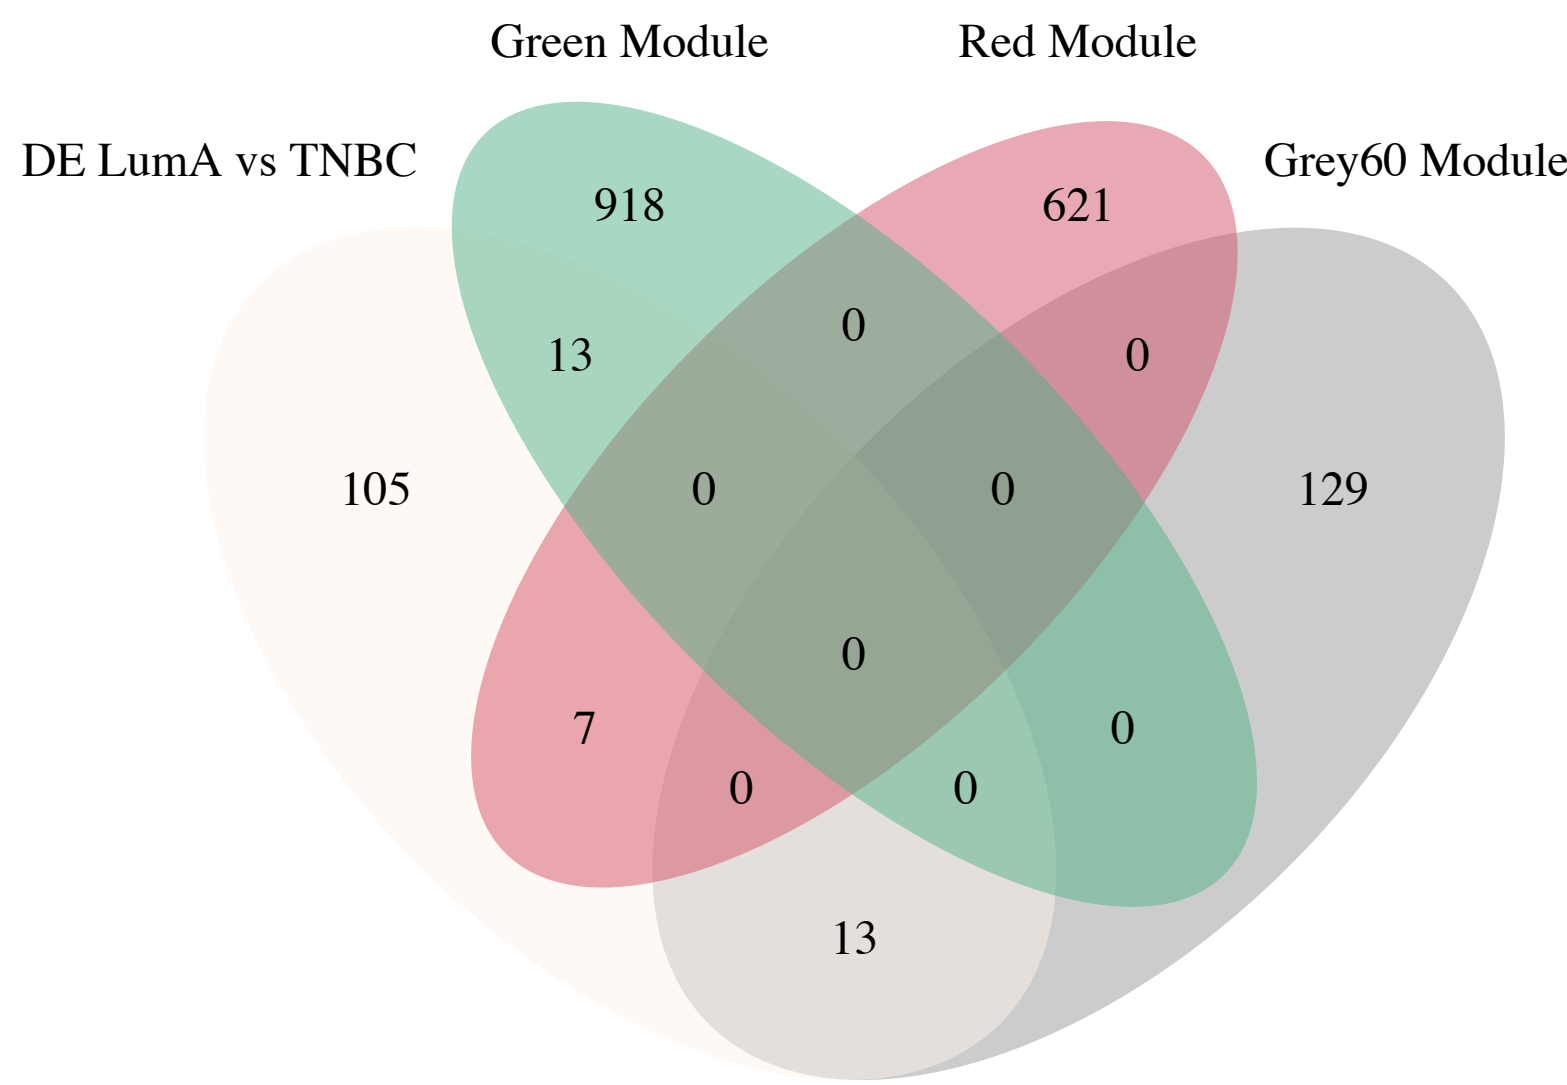

Fig. S6 B

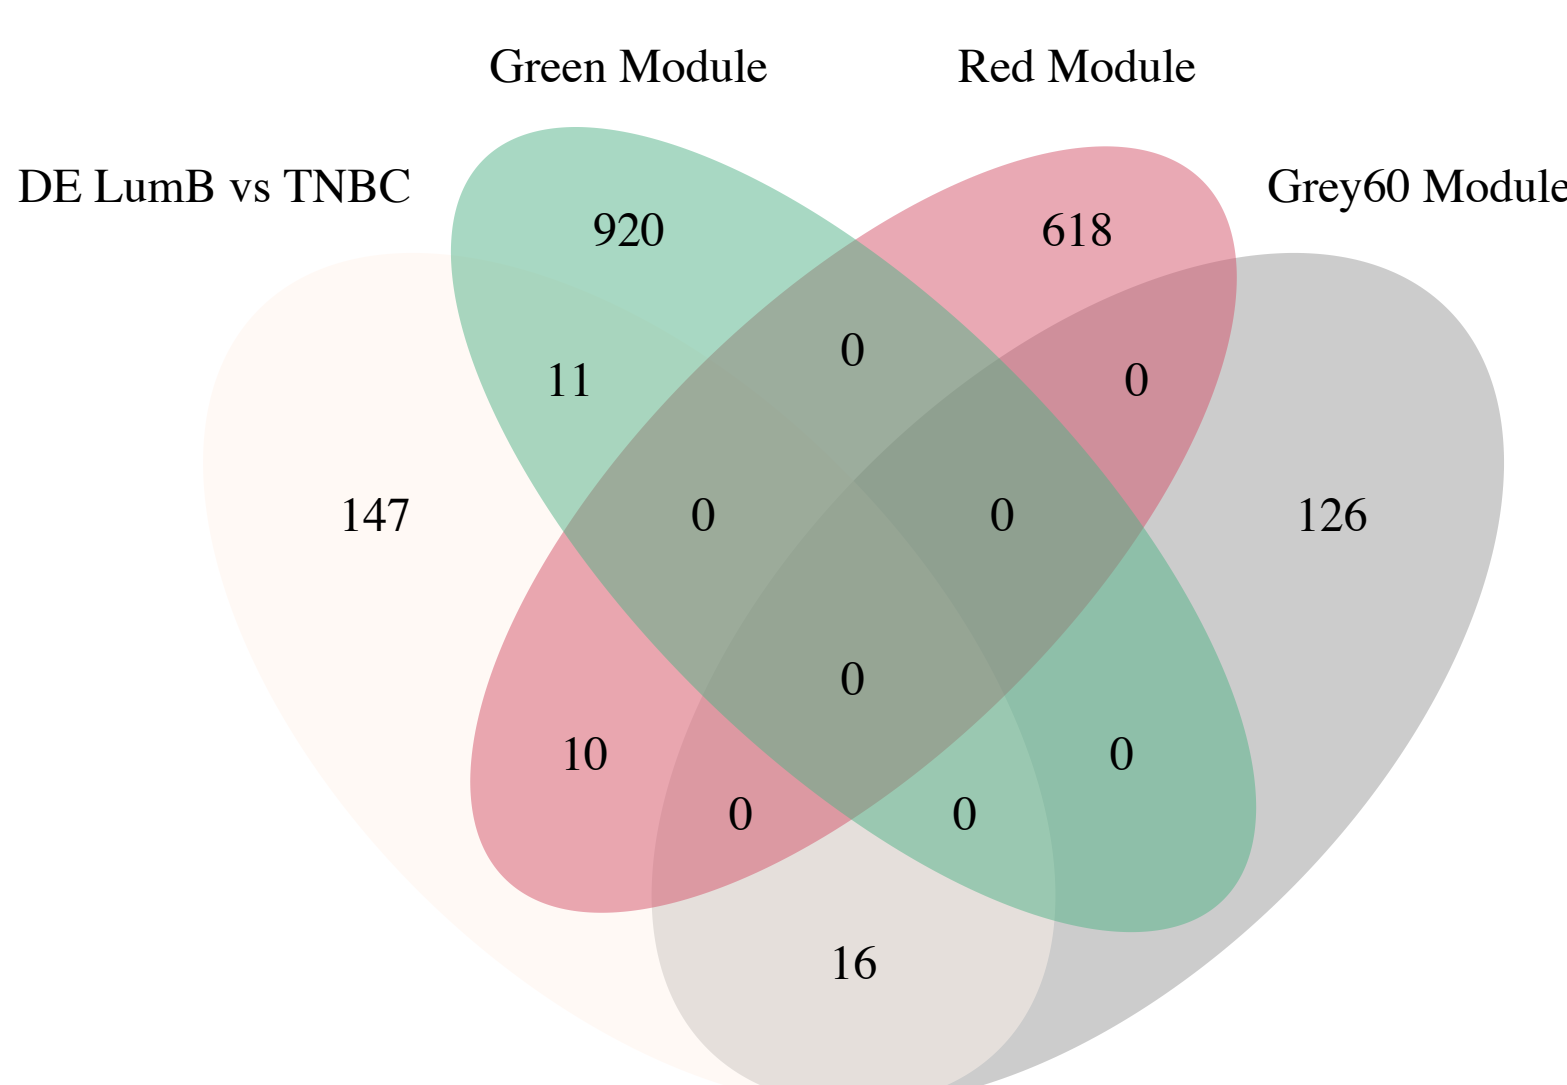

Fig. S6 C

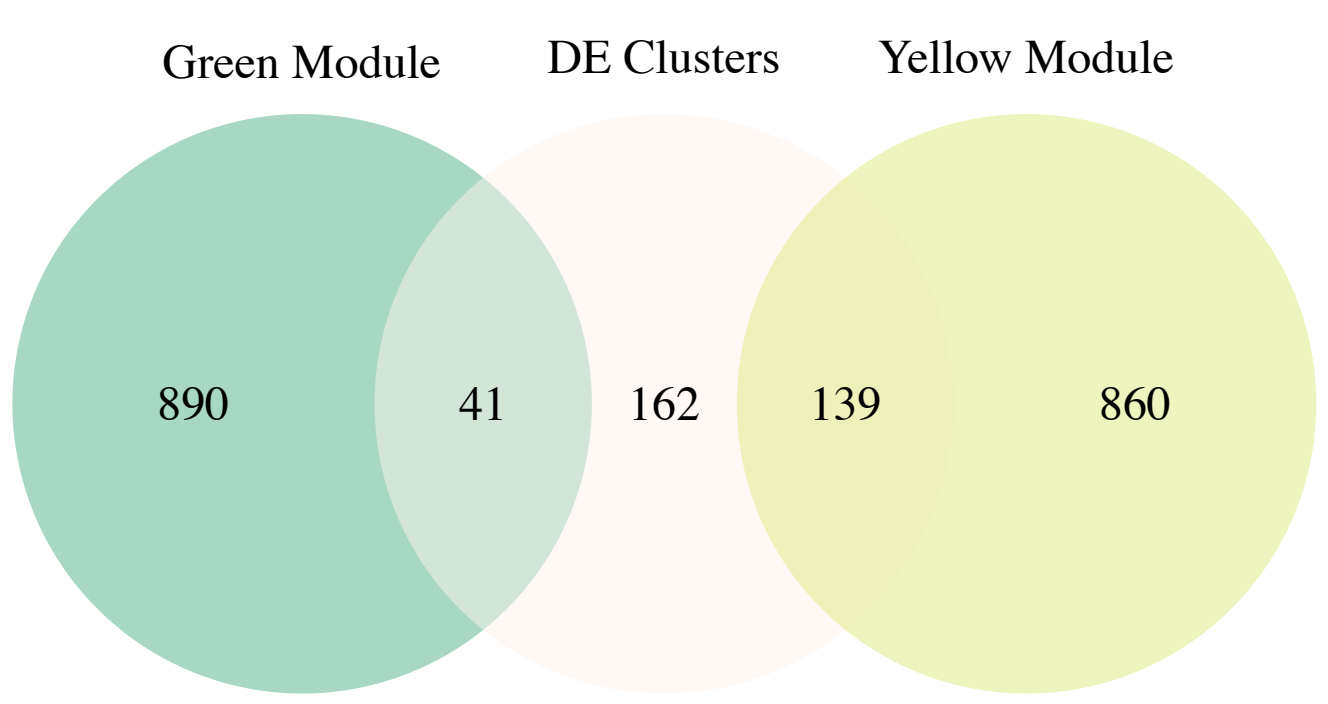

Fig. S6 D

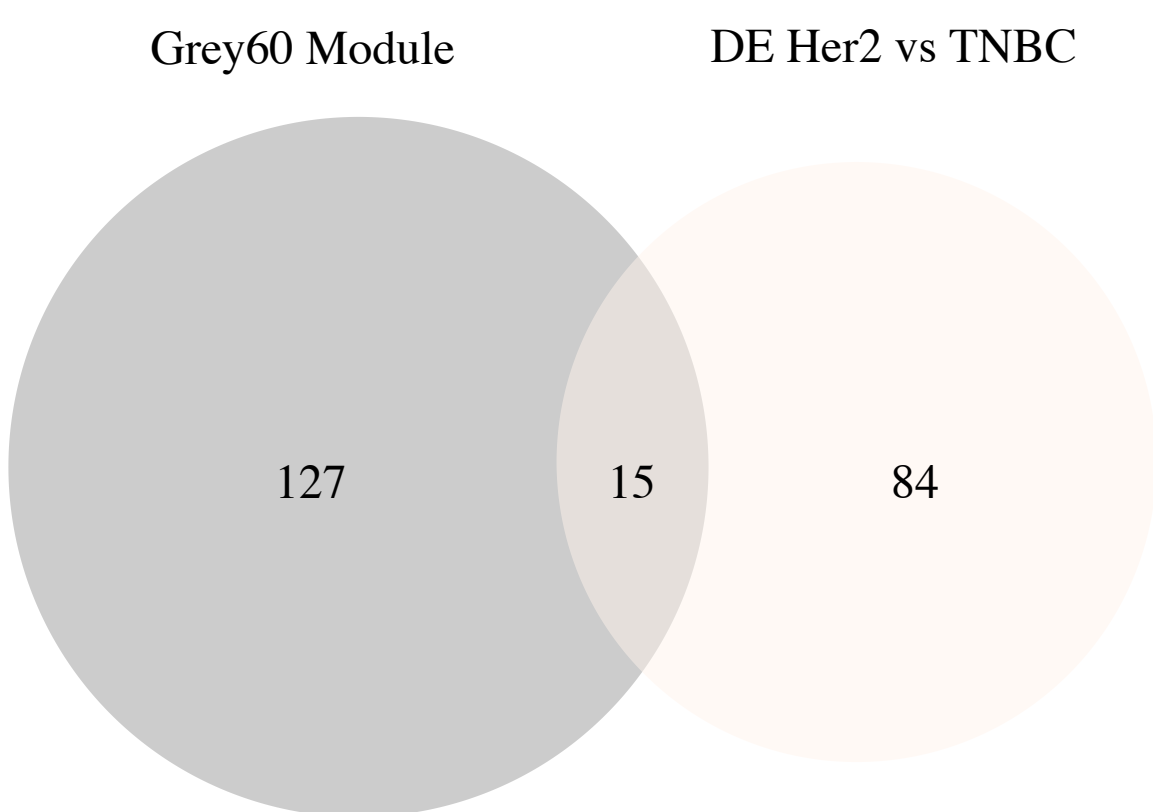

Fig. S6E

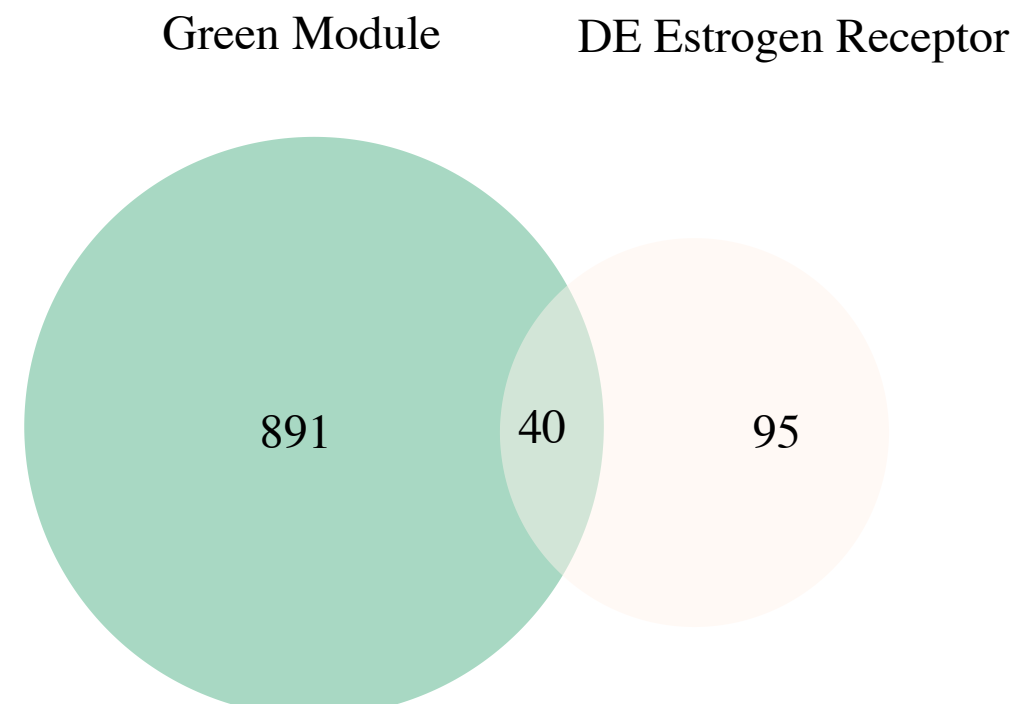

Fig. S6 F

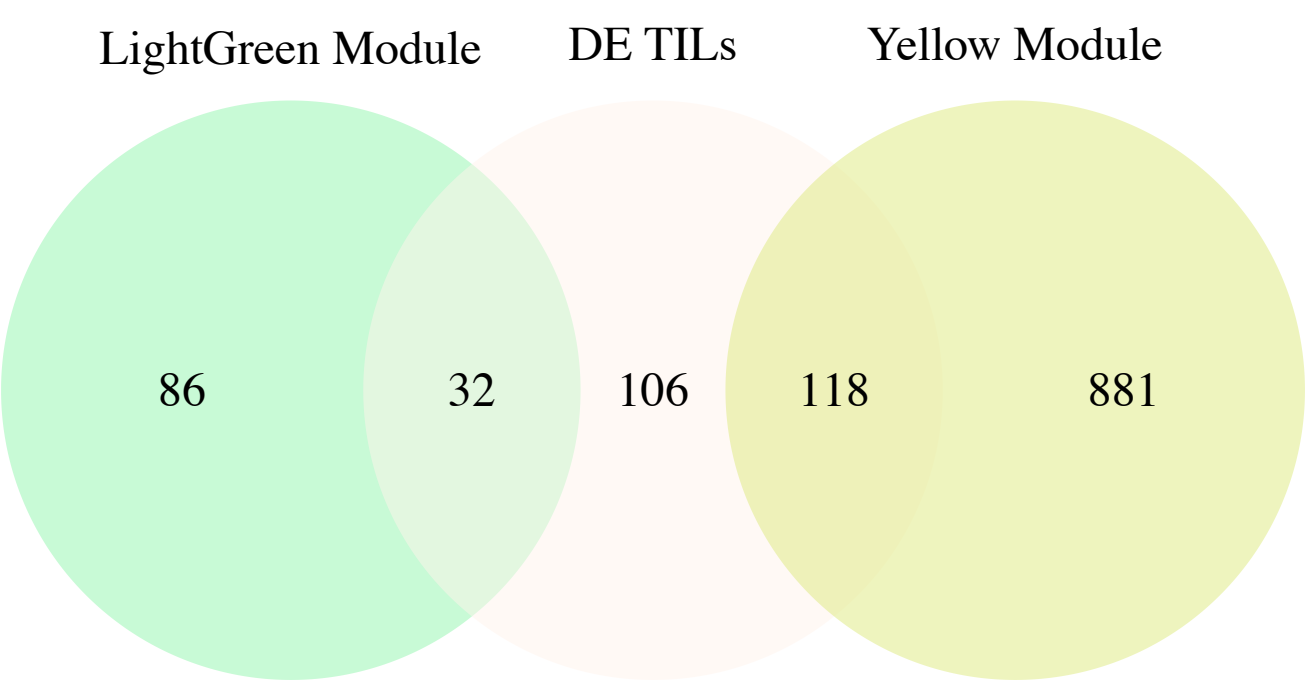

Fig. S6G

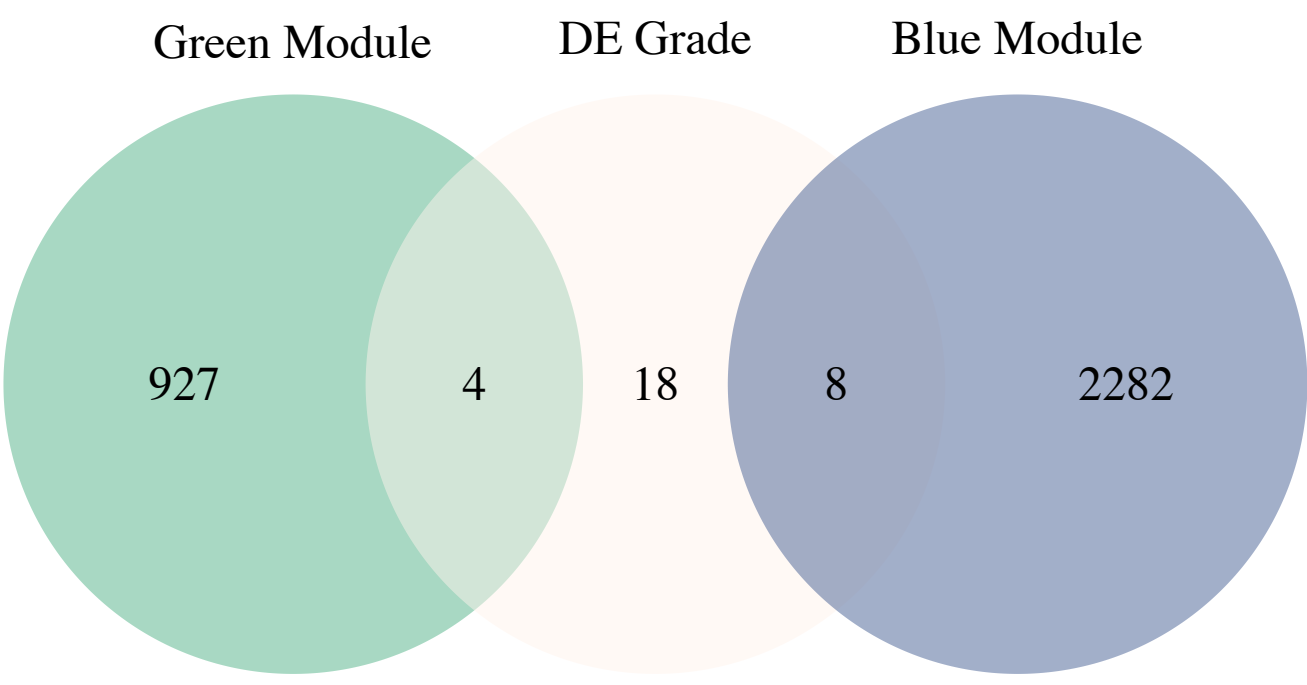

Supplement: MOESM10 [file 18133352]
