# Supplementary material for: Secreted breast tumor interstitial fluid microRNAs and their target genes are associated with triple-negative breast cancer, tumor grade, and immune infiltration
Source: Springer Nature journal article supplement (doi:10.1186/s13058-020-01295-6), 2020-06-30
Supplement: MOESM12 [file 18133352]

**Fig. S8**

**Fig. S8 A**

**Co-abundant miRNAs Module 1 (Blue Module)**

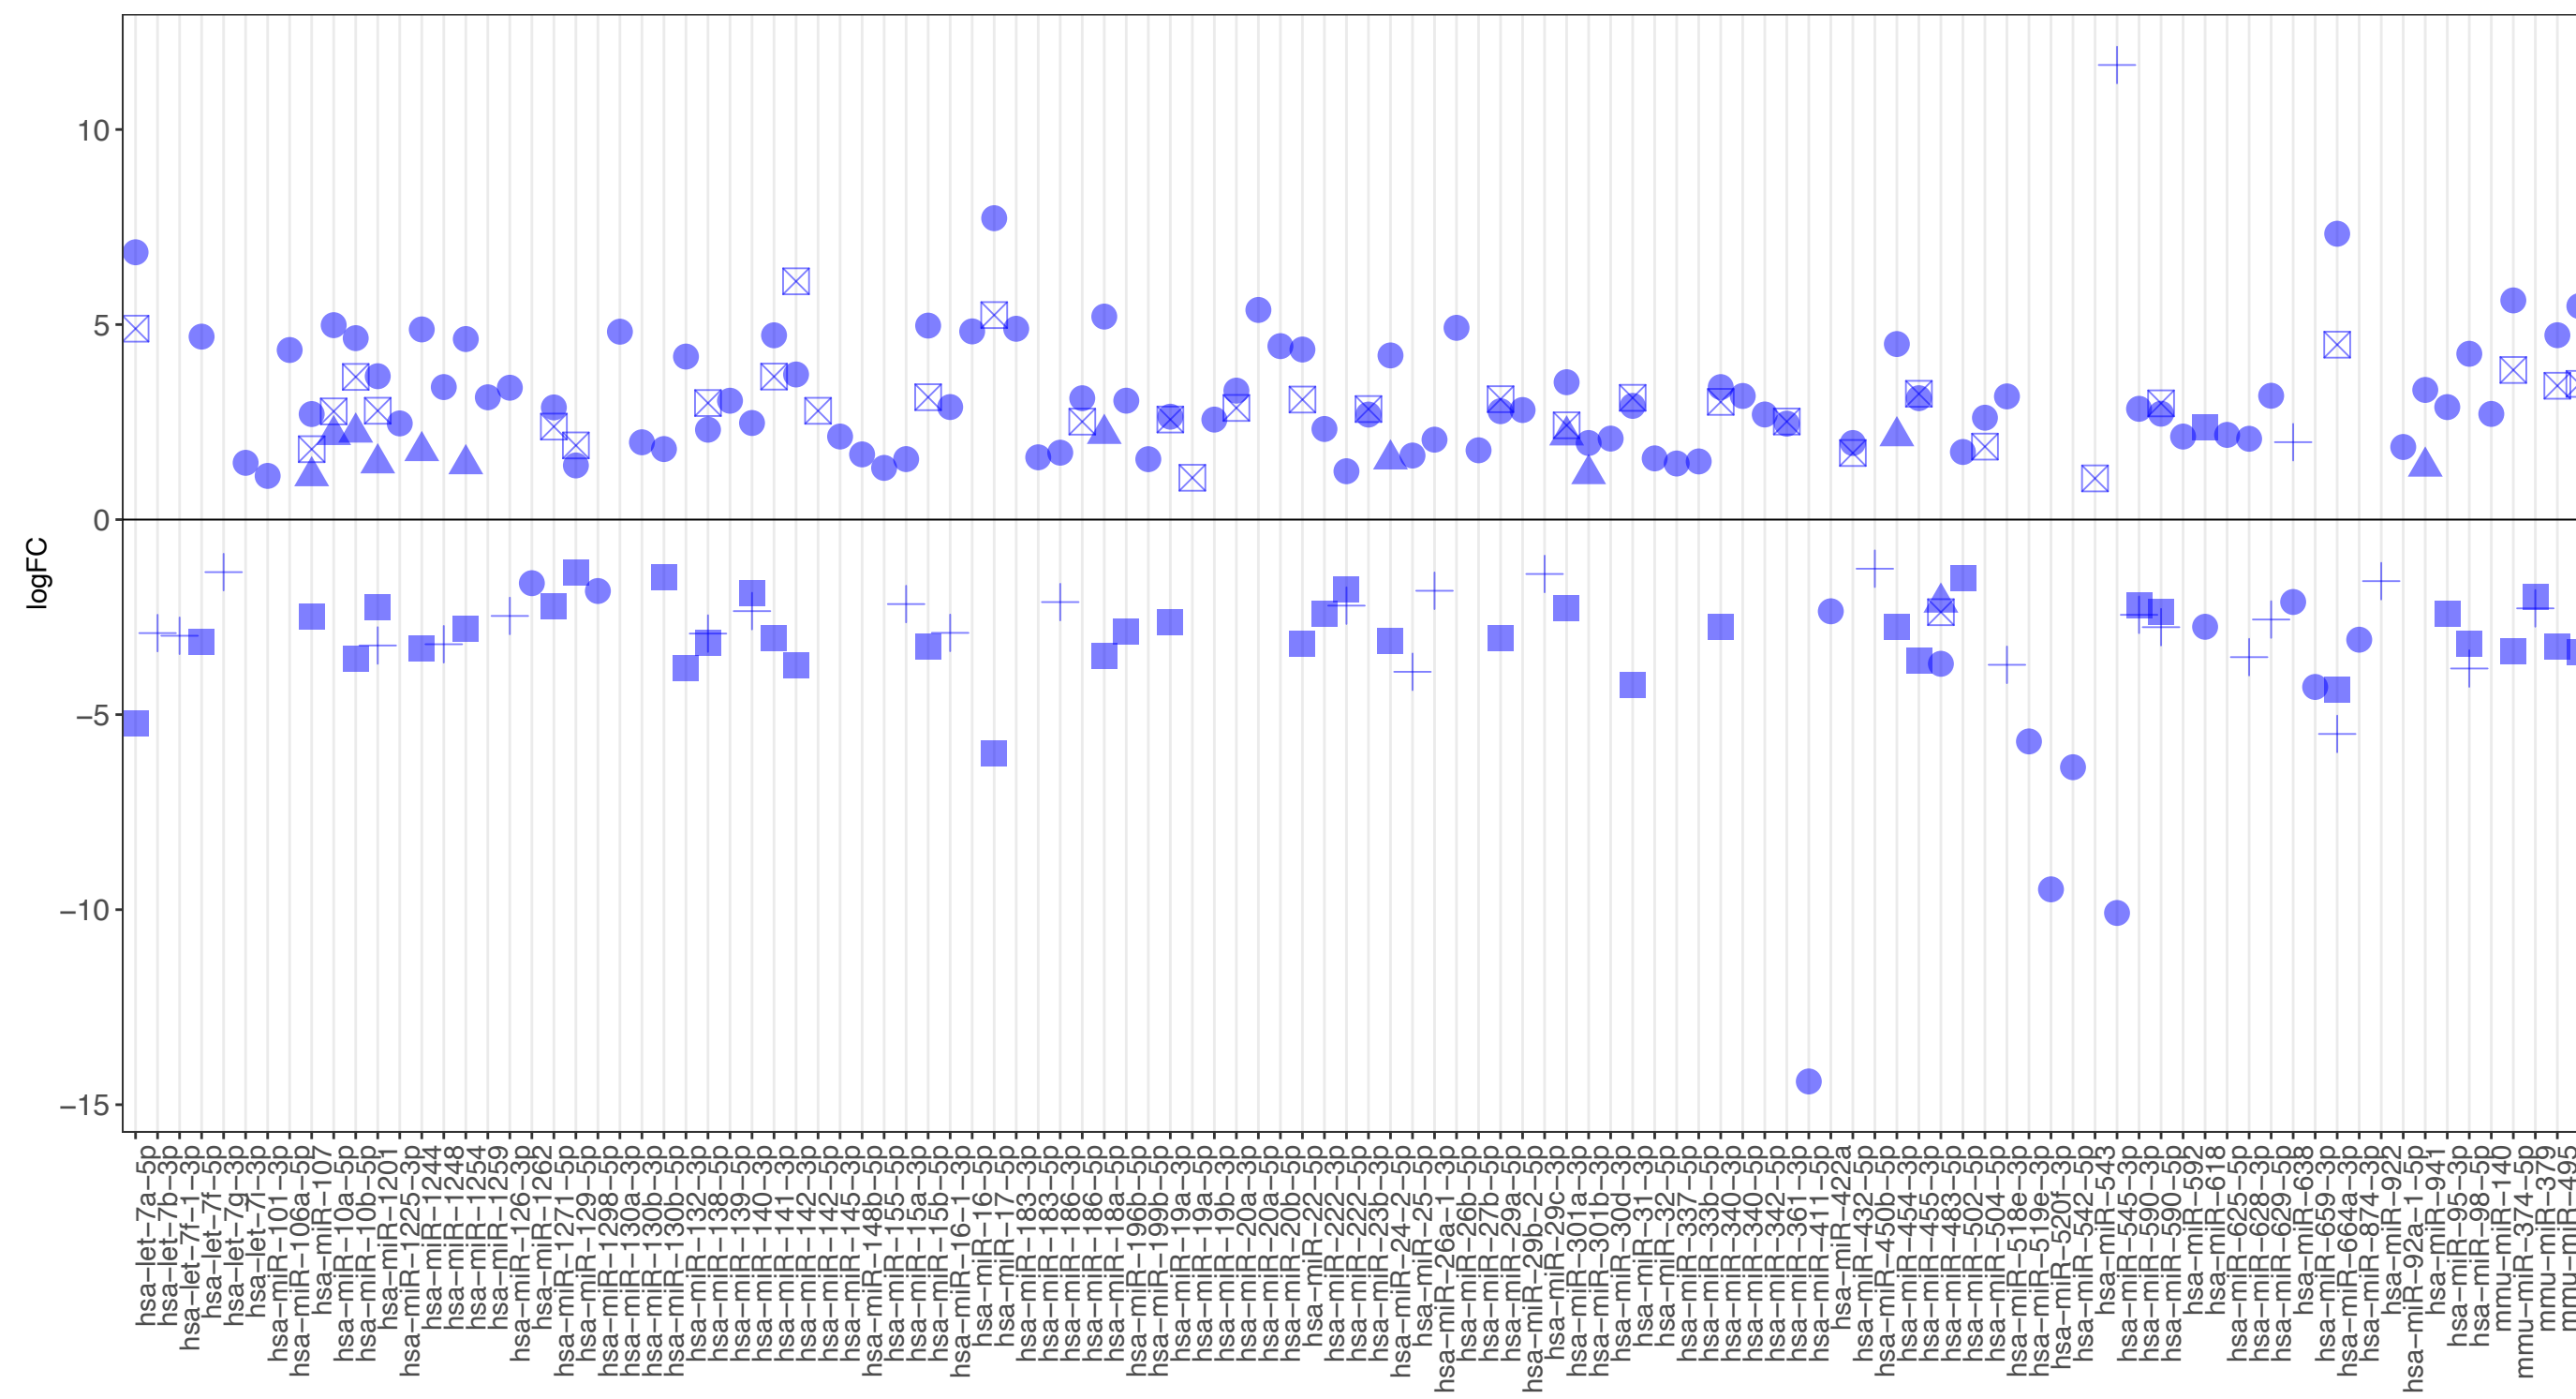

**Fig. S8 B**

**Co-abundant miRNAs Module 2 (Turquoise Module)**

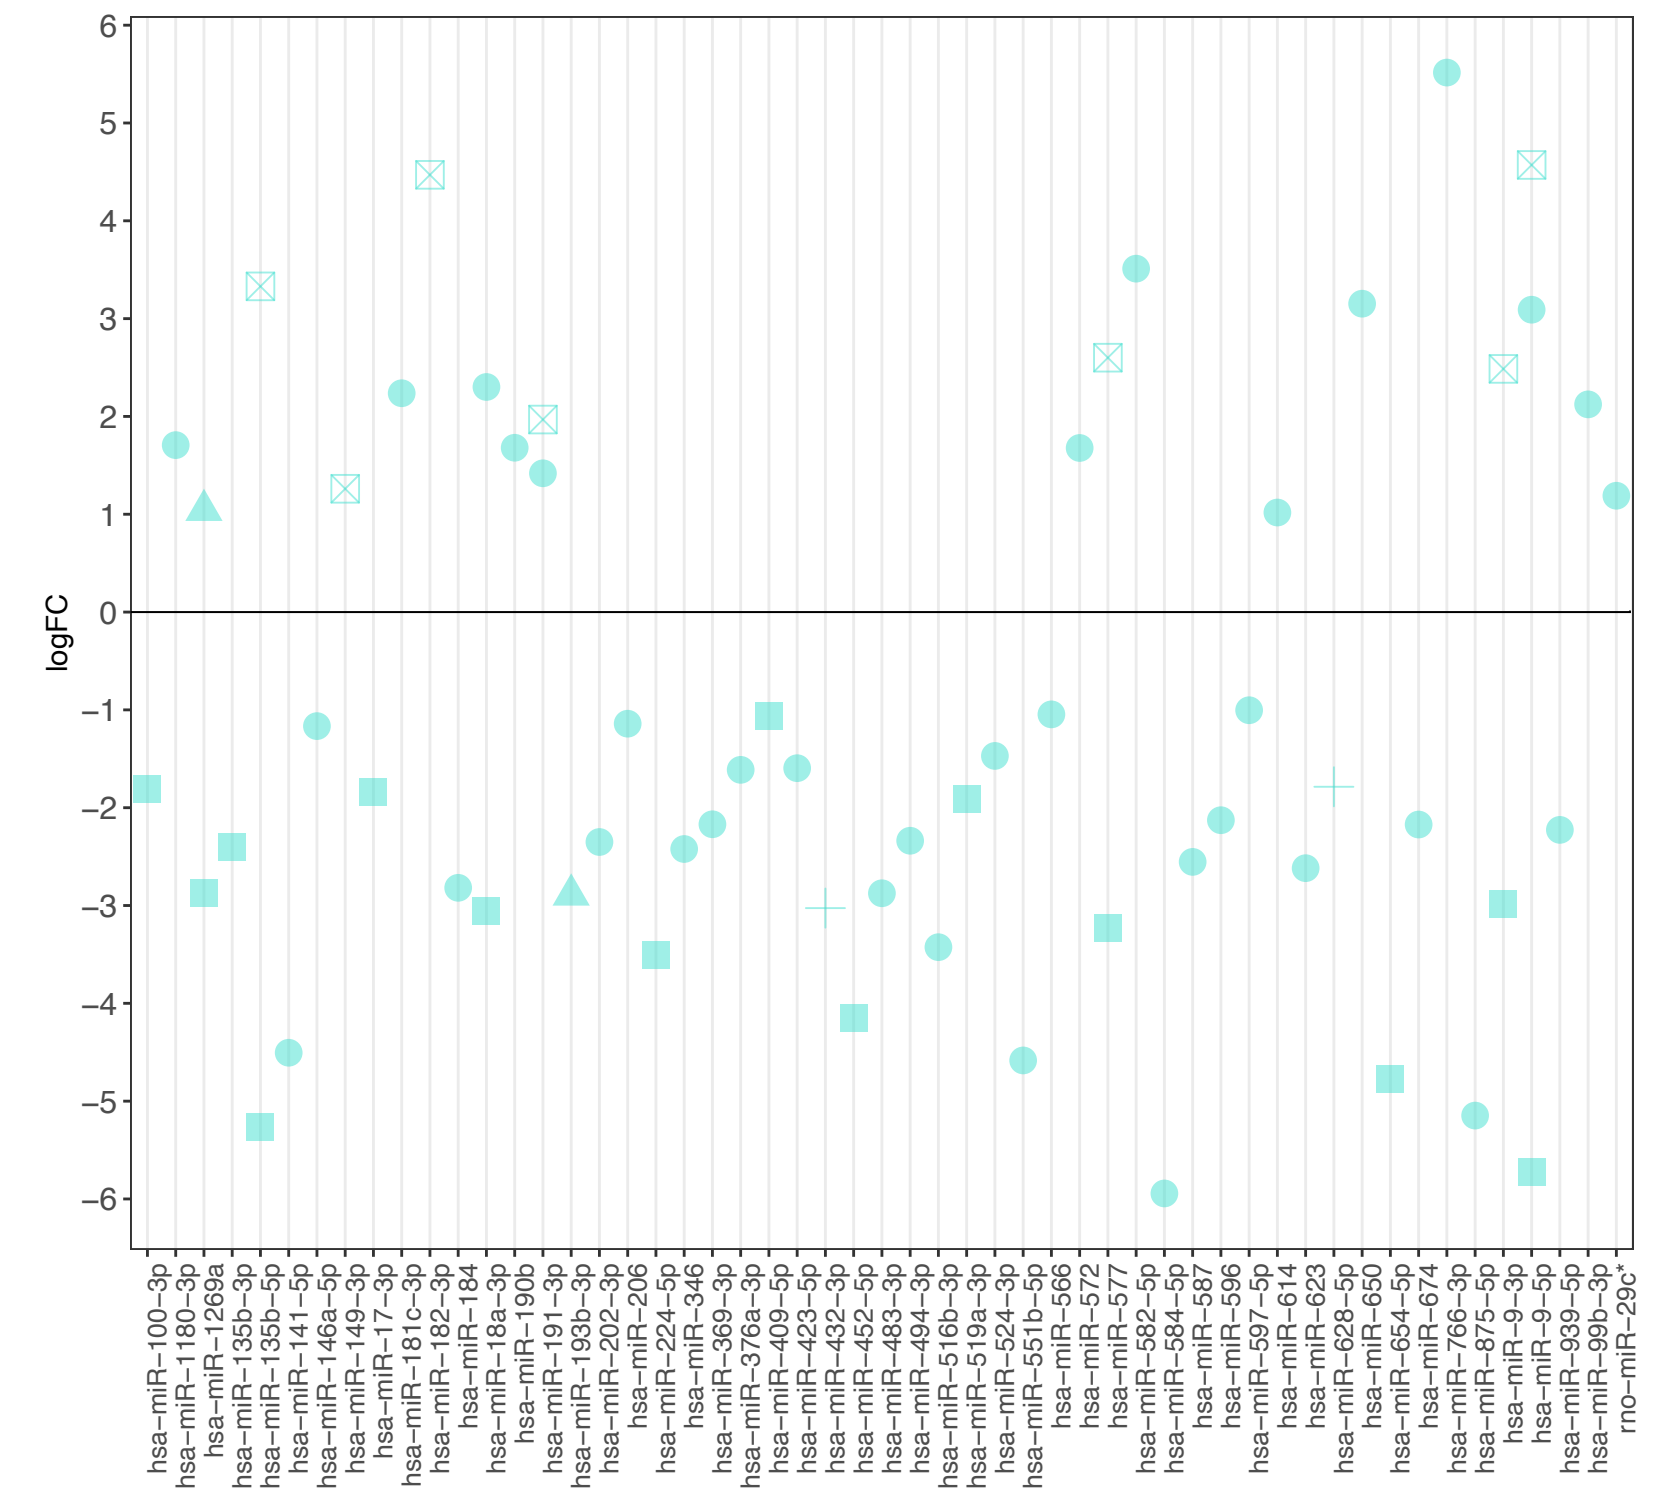

**Fig. S8 C**

**Co-abundant miRNAs Module 3 (Red Module)**

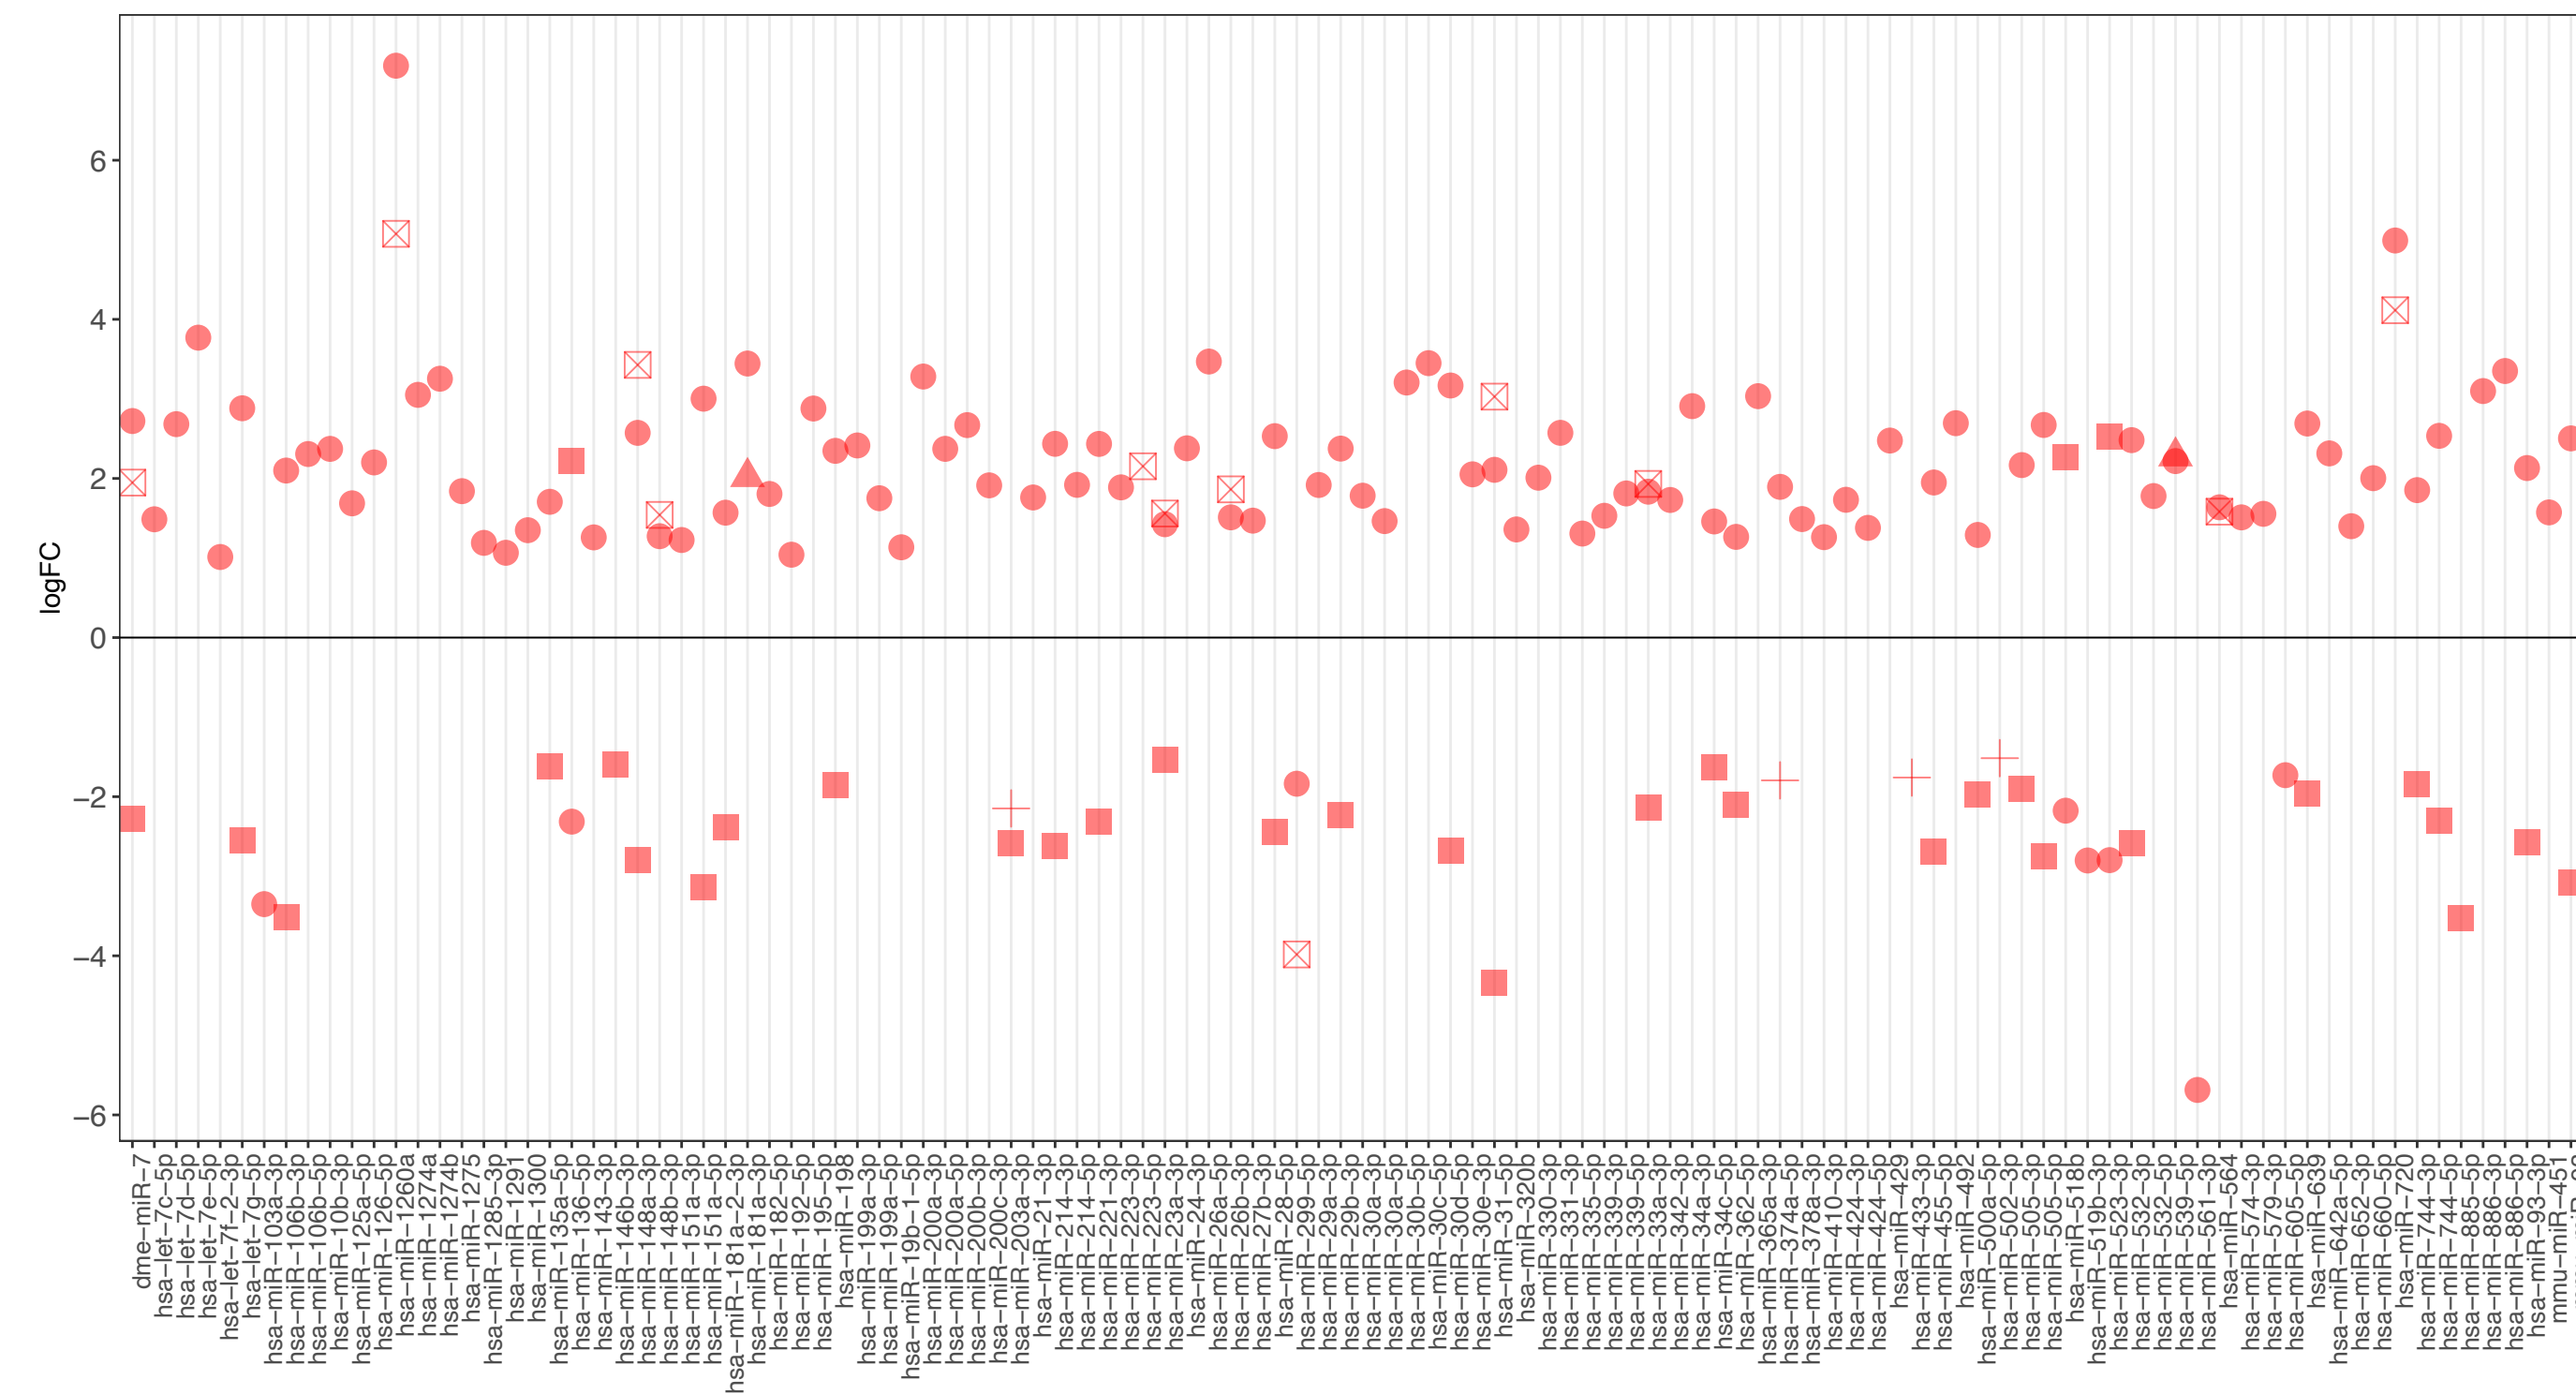

- Cluster 1 vs Cluster 2
- ▲ High Grade vs Medium/Low Grade
- Other Subtype vs TNBC
- + PgR+ vs PgR-
- ⊠ High TILs vs Low TILs
